# Supplementary material for: Genome Sequence and Analysis of Escherichia coli MRE600, a Colicinogenic, Nonmotile Strain that Lacks RNase I and the Type I Methyltransferase, EcoKI
Source: PubMed Central journal article supplement — Genome Biol Evol. 2016 Jan 22;8(3):742–52. doi: 10.1093/gbe/evw008 (PMC4825418; doi:10.1093/gbe/evw008), 2016-01-22
Supplement: supp_evw008_MRE600_genome_supplement_2.pdf [file supp_evw008_MRE600_genome_supplement_2.pdf]

**SUPPLEMENTARY FIGURES:**

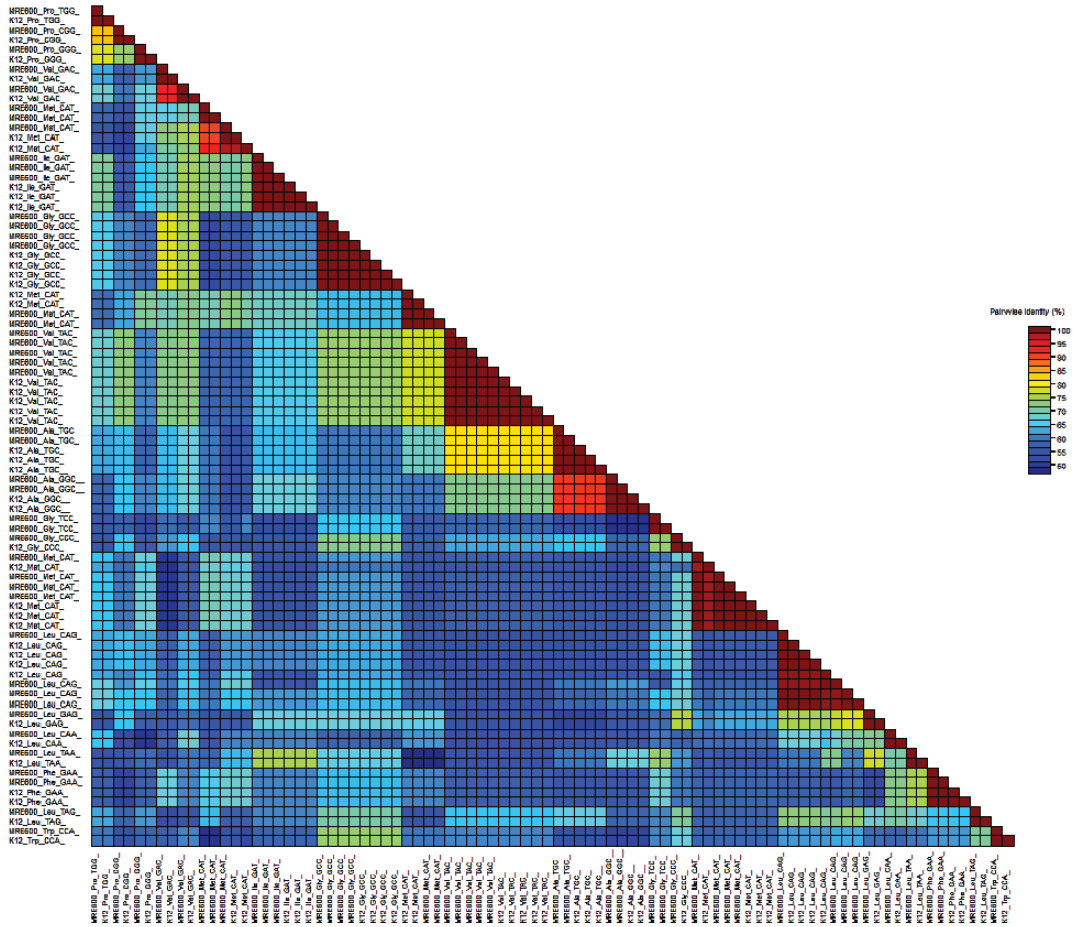

**SUPPLEMENTARY FIGURE S1.** A sequence comparison of MRE600 and K12<sup>1</sup> tRNAs that carry nonpolar amino acids. Pairwise sequence alignments were performed using the MUSCLE algorithm (Edgar 2004) and visualized using the Sequence Demarcation Tool Version 1.2 (Muhire, et al. 2014). tRNAs are labelled using the format: “organism\_amino acid\_anticodon.” <sup>1</sup>From GOLD Analysis Project ID: Ga0021515.

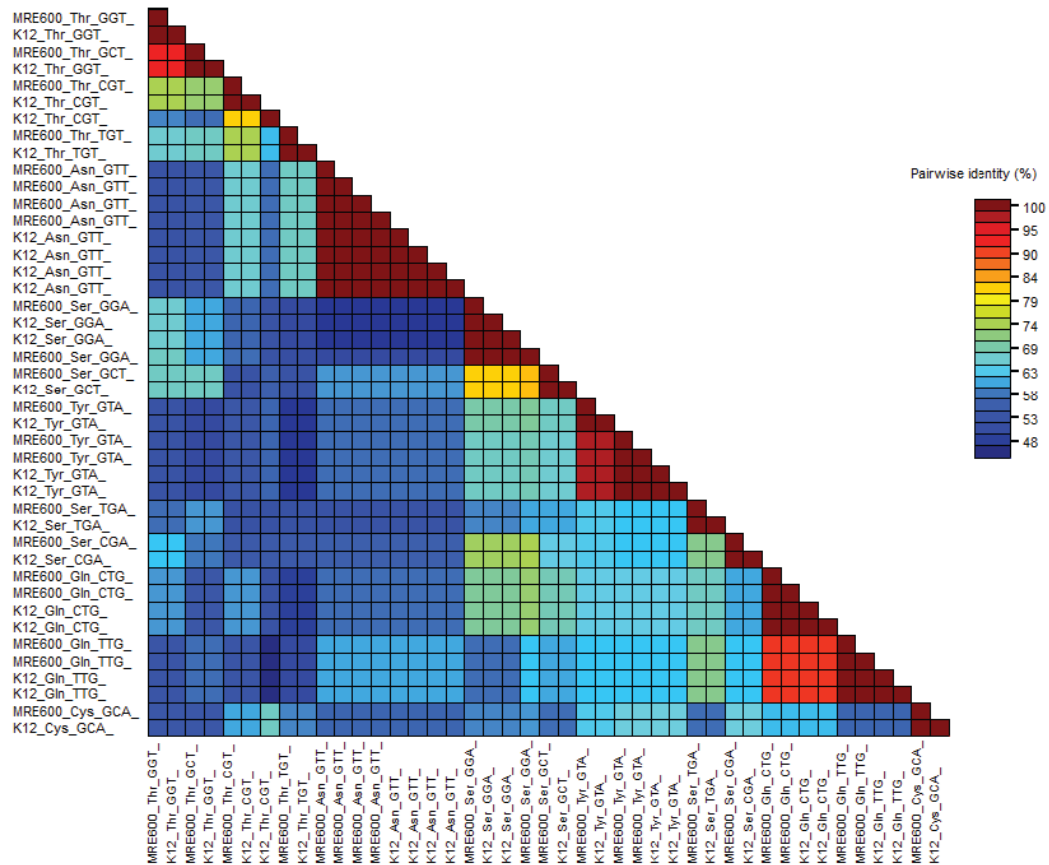

**SUPPLEMENTARY FIGURE S2.** A sequence comparison of MRE600 and K12<sup>1</sup> tRNAs that carry polar amino acids. Pairwise sequence alignments were performed using the MUSCLE algorithm (Edgar 2004) and visualized using the Sequence Demarcation Tool Version 1.2 (Muhire, et al. 2014). tRNAs are labelled using the format: “organism\_amino acid\_anticonodon.”<sup>1</sup>From GOLD Analysis Project ID: Ga0021515.

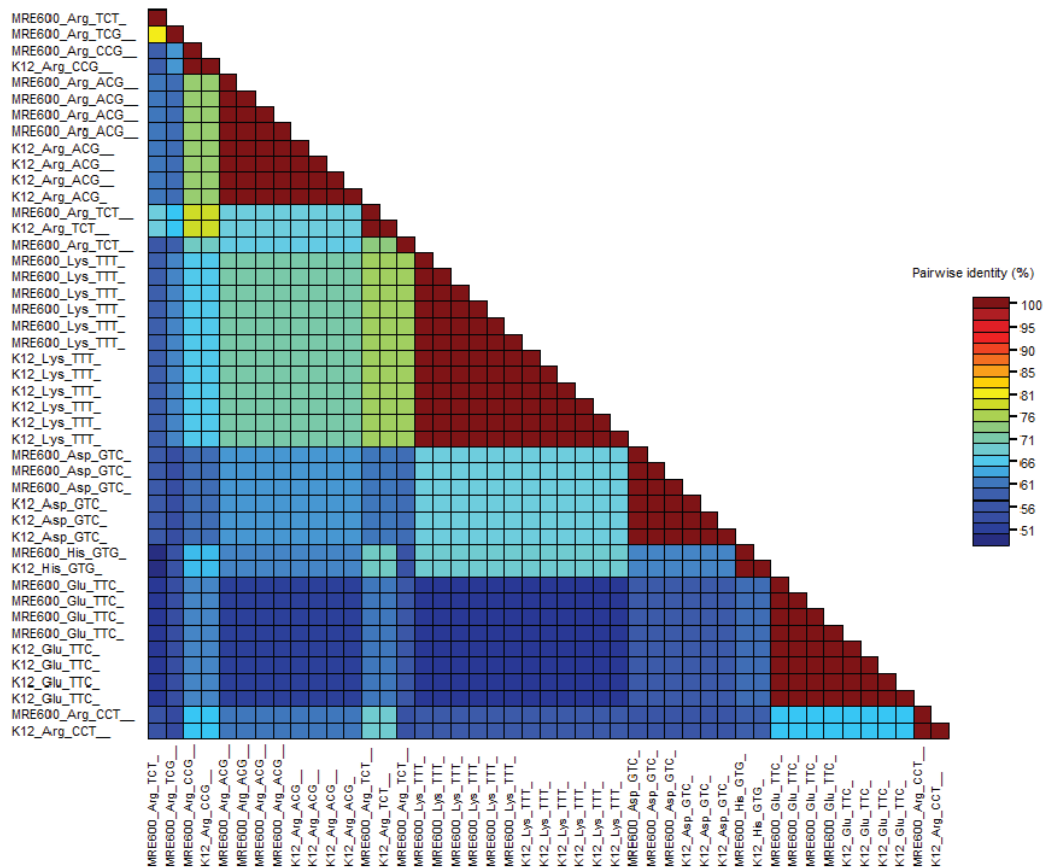

**SUPPLEMENTARY FIGURE S3.** A sequence comparison of MRE600 and K12<sup>1</sup> tRNAs that carry charged amino acids. Pairwise sequence alignments were performed using the MUSCLE algorithm (Edgar 2004) and visualized using the Sequence Demarcation Tool Version 1.2 (Muhire, et al. 2014). tRNAs are labelled using the format: “organism\_amino acid\_anticonodon.”<sup>1</sup>From GOLD Analysis Project ID: Ga0021515.

**SUPPLEMENTARY TABLES:**

**SUPPLEMENTARY TABLE S1.** Comparing the ribosomal protein gene content of MRE600 to K12<sup>1</sup>. All annotated ribosomal protein genes in K12 were identified in MRE600 with 100% amino acid sequence identity, with the exception of S2 and L15. S2 has a D127E substitution, while L15 has a V77I substitution.

| <b>Ribosomal Protein</b> | <b>Gene Name</b> | <b>% Identity to K12 Homolog</b> | <b>Identities</b> |
|--------------------------|------------------|----------------------------------|-------------------|
| S1                       | <i>rpsA</i>      | 100                              | 557/557           |
| S2                       | <i>rpsB</i>      | 99                               | 240/241           |
| S3                       | <i>rpsC</i>      | 100                              | 233/233           |
| S4                       | <i>rpsD</i>      | 100                              | 206/206           |
| S5                       | <i>rpsE</i>      | 100                              | 167/167           |
| S6                       | <i>rpsF</i>      | 100                              | 120/120           |
| S7                       | <i>rpsG</i>      | 100                              | 156/156           |
| S8                       | <i>rpsH</i>      | 100                              | 130/130           |
| S9                       | <i>rpsI</i>      | 100                              | 130/130           |
| S10                      | <i>rpsJ</i>      | 100                              | 103/103           |
| S11                      | <i>rpsK</i>      | 100                              | 129/129           |
| S12                      | <i>rpsL</i>      | 100                              | 124/124           |
| S13                      | <i>rpsM</i>      | 100                              | 118/118           |
| S14                      | <i>rpsN</i>      | 100                              | 101/101           |
| S15                      | <i>rpsO</i>      | 100                              | 89/89             |
| S16                      | <i>rpsP</i>      | 100                              | 82/82             |
| S17                      | <i>rpsQ</i>      | 100                              | 84/84             |
| S18                      | <i>rpsR</i>      | 100                              | 75/75             |
| S19                      | <i>rpsS</i>      | 100                              | 83/83             |
| S20                      | <i>rpsT</i>      | 100                              | 87/87             |
| S21                      | <i>rpsU</i>      | 100                              | 71/71             |
| L1                       | <i>rplA</i>      | 100                              | 234/234           |
| L2                       | <i>rplB</i>      | 100                              | 273/273           |
| L3                       | <i>rplC</i>      | 100                              | 209/209           |
| L4                       | <i>rplD</i>      | 100                              | 201/201           |
| L5                       | <i>rplE</i>      | 100                              | 179/179           |
| L6                       | <i>rplF</i>      | 100                              | 159/159           |
| L9                       | <i>rplI</i>      | 100                              | 149/149           |
| L10                      | <i>rplJ</i>      | 100                              | 165/165           |
| L11                      | <i>rplK</i>      | 100                              | 142/142           |
| L7/L12                   | <i>rplL</i>      | 100                              | 100/100           |
| L13                      | <i>rplM</i>      | 100                              | 142/142           |
| L14                      | <i>rplN</i>      | 100                              | 123/123           |
| L15                      | <i>rplO</i>      | 99                               | 127/128           |
| L16                      | <i>rplP</i>      | 100                              | 136/136           |
| L17                      | <i>rplQ</i>      | 100                              | 127/127           |
| L18                      | <i>rplR</i>      | 100                              | 117/117           |
| L19                      | <i>rplS</i>      | 100                              | 115/115           |

|     |             |     |         |
|-----|-------------|-----|---------|
| L20 | <i>rplT</i> | 100 | 107/107 |
| L21 | <i>rplU</i> | 100 | 103/103 |
| L22 | <i>rplV</i> | 100 | 110/110 |
| L23 | <i>rplW</i> | 100 | 100/100 |
| L24 | <i>rplX</i> | 100 | 94/94   |
| L25 | <i>rplY</i> | 100 | 94/94   |
| L27 | <i>rpmA</i> | 100 | 85/85   |
| L28 | <i>rpmB</i> | 100 | 78/78   |
| L29 | <i>rpmC</i> | 100 | 63/63   |
| L30 | <i>rpmD</i> | 100 | 59/59   |
| L31 | <i>rpmE</i> | 100 | 70/70   |
| L32 | <i>rpmF</i> | 100 | 57/57   |
| L33 | <i>rpmG</i> | 100 | 55/55   |
| L34 | <i>rpmH</i> | 100 | 46/46   |
| L35 | <i>rpmI</i> | 100 | 65/65   |
| L36 | <i>rpmJ</i> | 100 | 37/37   |

<sup>1</sup>From accession #U00096.3

## REFERENCES:

Edgar RC 2004. MUSCLE: a multiple sequence alignment method with reduced time and space complexity. BMC Bioinformatics 5: 113. doi: 10.1186/1471-2105-5-113

Muhire BM, Varsani A, Martin DP 2014. SDT: a virus classification tool based on pairwise sequence alignment and identity calculation. PLoS One 9: e108277. doi: 10.1371/journal.pone.0108277
